# Supplementary material
Source: PubMed Central journal article supplement (PMC6064668)
Supplement: NIHMS966875-supplement-Supplemental.pdf [file NIHMS966875-supplement-Supplemental.pdf]

**Table S1 Genes Enriched in the Rodent DA by Three or More Microarrays (Fold Change (FC); DA vs Ao)**

| Gene Symbol <sup>1,2</sup> | Gene Name                                                          | Entrez ID | Study # | Jin FC | Hseih FC | Shelton FC | Bokenkamp SMC FC | Bokenkamp Endo FC |
|----------------------------|--------------------------------------------------------------------|-----------|---------|--------|----------|------------|------------------|-------------------|
| <i>Abcc9</i>               | ATP binding cassette subfamily C member 9                          | 25560     | 4       | 5.6    | 2.6      | 2.8        | 1.7              | 1.5               |
| <i>Actg2</i>               | actin, gamma 2, smooth muscle, enteric                             | 25365     | 4       | 2.8    | 2.3      | 7.8        | 2.2              | 2.0               |
| <i>Dpep1</i>               | dipeptidase 1 (renal)                                              | 94199     | 4       | 6.1    | 3.7      | 1.5        | 3.0              |                   |
| <i>Ecn1</i>                | endothelin 1                                                       | 24323     | 4       | 1.4    | 1.6      | 1.5        |                  | 1.7               |
| <i>Fhl2</i>                | four and a half LIM domains 2                                      | 63839     | 4       | 4.9    | 2.7      | 1.8        | 3.0              | 2.8               |
| <i>Lrba</i>                | LPS responsive beige-like anchor protein                           | 361975    | 4       | 9.2    | 2.9      | 2.0        | 1.9              | 1.7               |
| <i>Ncam1</i>               | neural cell adhesion molecule 1                                    | 24586     | 4       | 2.0    | 1.4      | 2.3        | 1.5              |                   |
| <i>Nr4a1</i>               | nuclear receptor subfamily4, group A, member1                      | 79240     | 4       | 1.7    | 1.5      | 1.5        | 1.5              |                   |
| <i>Pcsk5</i>               | proprotein convertase subtilisin/kexin type 5                      | 116548    | 4       | 4.8    | 2.5      | 1.6        | 3.0              | -1.2              |
| <i>Penk</i>                | proenkephalin                                                      | 29237     | 4       | 1.8    | 1.3      | 2.4        | 2.2              | 2.3               |
| <i>Ppp1r12a</i>            | protein phosphatase 1, regulatory subunit 12A                      | 116670    | 4       | 2.3    | 1.4      | 2.4        | 1.8              |                   |
| <i>Ptger4</i>              | prostaglandin E receptor 4                                         | 84023     | 4       | 2.6    | 2.4      | 3.8        | 3.8              | -1.3              |
| <i>Tnfrsf11b</i>           | TNF receptor superfamily member 11B                                | 25341     | 4       | 4.8    | 2.7      | 3.8        | 2.8              | 3.5               |
| <i>Adamts1</i>             | ADAM metalloproteinase with thrombospondin type 1 motif, 1         | 79252     | 3       |        | 3.1      | 1.8        | 2.4              |                   |
| <i>Adamts9</i>             | ADAM metalloproteinase with thrombospondin type 1 motif, 9         | 312566    | 3       |        | 3.9      | 3.1        | 2.7              | 2.7               |
| <i>Adamts12</i>            | ADAMTS-like 2                                                      | 311827    | 3       |        | 4.0      | 3.1        | 2.0              |                   |
| <i>Adgrl3</i>              | adhesion G protein-coupled receptor L3                             | 170641    | 3       | 3.9    | 1.3      | 1.4        |                  | -1.4              |
| <i>Agtr1a</i>              | angiotensin II receptor, type 1a                                   | 24180     | 3       | 1.4    | 1.5      | -1.8       | 1.5              | 4.3               |
| <i>Akap5</i>               | A-kinase anchoring protein 5                                       | 171026    | 3       |        | 2.1      | 8.4        | 1.9              | 2.1               |
| <i>Atp1b1</i>              | ATPase Na <sup>+</sup> /K <sup>+</sup> transporting subunit beta 1 | 25650     | 3       | 2.8    | 1.5      | -1.7       | 2.6              |                   |
| <i>Barx1</i>               | BARX homeobox 1                                                    | 364680    | 3       |        | 1.3      | 1.3        | 1.2              |                   |
| <i>Bmp2</i>                | bone morphogenetic protein 2                                       | 29373     | 3       |        | 1.3      | 1.5        |                  | 1.9               |
| <i>Bmp4</i>                | bone morphogenetic protein 4                                       | 25296     | 3       | 2.6    | 1.5      |            |                  | 1.8               |
| <i>Cacna1c</i>             | calcium voltage-gated channel subunit alpha1C                      | 24239     | 3       | 2.1    |          | 1.5        | 1.2              |                   |
| <i>Cd55</i>                | CD55 molecule, decay accelerating factor for complement            | 64036     | 3       | 6.4    |          | 1.5        |                  | 1.5               |
| <i>Cdk17</i>               | cyclin-dependent kinase 17                                         | 314743    | 3       | 1.4    |          | 1.4        | 1.5              |                   |
| <i>Celsr2</i>              | cadherin, EGF LAG seven-pass G-type receptor 2                     | 83465     | 3       | 1.6    | 1.4      | 1.5        |                  |                   |
| <i>Cnn1</i>                | calponin 1                                                         | 65204     | 3       | 1.4    | 1.4      | 2.7        |                  |                   |
| <i>Cntn3</i>               | contactin 3                                                        | 54279     | 3       |        | 1.9      | 3.6        |                  | 1.3               |
| <i>Cyr61</i>               | cysteine-rich, angiogenic inducer, 61                              | 83476     | 3       | 2.2    | 1.4      | 4.0        |                  |                   |
| <i>Dab2</i>                | DAB2, clathrin adaptor protein                                     | 79128     | 3       |        | 1.4      | 2.3        |                  | 1.9               |
| <i>Des</i>                 | desmin                                                             | 64362     | 3       | 6.1    | 2.6      | 5.0        |                  |                   |
| <i>Egr1</i>                | early growth response 1                                            | 24330     | 3       | -1.2   | 1.4      | 1.3        | 2.0              | 1.9               |
| <i>Enpp3</i>               | ectonucleotide pyrophosphatase/phosphodiesterase 3                 | 54410     | 3       | 2.0    | 2.9      | -1.9       | 1.9              |                   |
| <i>Fat4</i>                | FAT atypical cadherin 4                                            | 310341    | 3       |        | 1.4      | 2.1        |                  | 1.5               |
| <i>Fgfr2</i>               | fibroblast growth factor receptor 2                                | 25022     | 3       | 5.8    | 2.0      | 3.1        |                  | -1.2              |
| <i>Ghr</i>                 | growth hormone receptor                                            | 25235     | 3       | 9.5    | 1.8      |            | 2.0              |                   |
| <i>Gpm6b</i>               | glycoprotein m6b                                                   | 192179    | 3       |        | 6.3      | 2.8        | 2.6              |                   |
| <i>Greml1</i>              | gremlin 1, DAN family BMP antagonist                               | 50566     | 3       |        | 1.6      | 12.3       | 2.9              |                   |
| <i>Grm3</i>                | glutamate metabotropic receptor 3                                  | 24416     | 3       | 3.6    | 1.6      | 1.4        |                  |                   |
| <i>Higd1a</i>              | HIG1 hypoxia inducible domain family, member 1A                    | 140937    | 3       | 7.5    | 1.5      |            | 2.1              | 1.6               |
| <i>Hoxa4</i>               | homeo box A4                                                       | 100912525 | 3       |        | 1.4      | 2.8        | 1.5              |                   |
| <i>Hspa1a</i>              | heat shock 70kD protein 1A                                         | 24472     | 3       | 18.5   | 3.3      |            | 5.2              |                   |
| <i>Hspb1</i>               | heat shock protein family B (small) member 1                       | 24471     | 3       | 2.1    | 3.0      |            | 2.2              |                   |
| <i>Hspb8</i>               | heat shock protein family B (small) member 8                       | 113906    | 3       |        | 1.5      | 1.3        | 2.7              |                   |
| <i>Il15</i>                | interleukin 15                                                     | 25670     | 3       | 6.1    | 1.6      | 2.5        |                  |                   |
| <i>Inhba</i>               | inhibin beta A subunit                                             | 29200     | 3       |        | 3.5      | 2.2        | 2.6              | 2.4               |
| <i>Kcnj8</i>               | potassium voltage-gated channel subfamily J member 8               | 25472     | 3       | 2.8    | 1.8      | 9.0        |                  |                   |
| <i>Kcnk3</i>               | potassium two pore domain channel subfamily K member 3             | 29553     | 3       | 5.8    |          | 2.4        | 1.8              |                   |
| <i>Kctd1</i>               | potassium channel tetramerization domain containing 1              | 291772    | 3       |        | 2.3      | 1.7        | 2.9              | 2.5               |
| <i>Lama1</i>               | laminin subunit alpha 1                                            | 316758    | 3       |        | 2.1      | 2.2        | 2.1              | 2.0               |
| <i>Lrrn3</i>               | leucine rich repeat neuronal 3                                     | 81514     | 3       |        | 1.4      | 2.4        | 1.7              |                   |
| <i>Ltbp1</i>               | latent transforming growth factor beta binding protein 1           | 59107     | 3       | 2.7    | 1.5      | 2.3        |                  |                   |
| <i>Mab21l2</i>             | mab-21 like 2                                                      | 680102    | 3       |        | 7.2      |            | 3.7              | 1.7               |
| <i>Marc2</i>               | mitochondrial amidoxime reducing component 2                       | 171451    | 3       | 3.1    | 2.9      |            |                  | 1.8               |
| <i>Meis1</i>               | Meis homeobox 1                                                    | 686117    | 3       |        | 1.7      | 2.2        | 1.5              | 1.4               |
| <i>Mfsd2a</i>              | major facilitator superfamily domain containing 2A                 | 298504    | 3       |        | 2.0      | 1.5        | 1.2              |                   |
| <i>Mgll</i>                | monoglyceride lipase                                               | 29254     | 3       | 3.2    | 1.5      | 1.3        |                  |                   |
| <i>Nalcn</i>               | sodium leak channel, non-selective                                 | 266760    | 3       | 6.2    | 1.4      | 1.7        | -2.3             |                   |
| <i>Nr4a3</i>               | nuclear receptor subfamily 4, group A, member 3                    | 58853     | 3       |        | 1.2      | 3.5        | 2.4              | 3.2               |
| <i>Olfml2b</i>             | olfactomedin-like 2B                                               | 304960    | 3       |        | 1.4      | 1.8        | 1.7              |                   |
| <i>Parm1</i>               | prostate androgen-regulated mucin-like protein 1                   | 286894    | 3       |        | 1.8      | 1.8        | 1.7              |                   |
| <i>Pde4b</i>               | phosphodiesterase 4B                                               | 24626     | 3       | 2.1    |          | 2.0        | 2.4              | 1.6               |

**Table S1 (cont.) Genes Enriched in the Rodent DA by Three or More Microarrays (Fold Change (FC); DA vs Ao)**

| Gene Symbol <sup>1,2</sup> | Gene Name                                                    | Entrez ID | Study # | Jin FC | Hseih FC | Shelton FC | Bokenkamp SMC FC | Bokenkamp Endo FC |
|----------------------------|--------------------------------------------------------------|-----------|---------|--------|----------|------------|------------------|-------------------|
| <i>Prkar2b</i>             | protein kinase cAMP-dependent type 2 regulatory subunit beta | 24679     | 3       | 1.4    | 1.4      |            | 2.0              | 1.6               |
| <i>Ptbp1</i>               | polypyrimidine tract binding protein 1                       | 29497     | 3       | 1.4    |          | 1.2        |                  | 1.5               |
| <i>Ptn</i>                 | pleiotrophin                                                 | 24924     | 3       | 1.7    | 3.2      | 1.5        |                  |                   |
| <i>Rdh10</i>               | retinol dehydrogenase 10                                     | 353252    | 3       |        | 1.8      | 1.5        | 1.7              | 1.8               |
| <i>Rgs5</i>                | regulator of G-protein signaling 5                           | 54294     | 3       |        | 1.5      | 4.4        | 3.1              | 3.3               |
| <i>Runx1</i>               | runt-related transcription factor 1                          | 50662     | 3       |        | 1.6      | 2.9        | 2.8              | 2.0               |
| <i>Ryr3</i>                | ryanodine receptor 3                                         | 170546    | 3       |        | 1.4      | 1.8        | 2.5              |                   |
| <i>Scx</i>                 | scleraxis bHLH transcription factor                          | 680712    | 3       |        | 1.6      | 2.3        | 2.9              |                   |
| <i>Serinc3</i>             | serine incorporator 3                                        | 296350    | 3       | 1.9    |          | 1.4        | 1.2              |                   |
| <i>Sfrp1</i>               | secreted frizzled-related protein 1                          | 84402     | 3       |        | 2.4      | 2.3        | 2.5              | 2.1               |
| <i>Sfrp2</i>               | secreted frizzled-related protein 2                          | 310552    | 3       |        | 1.9      | 1.4        | 1.8              |                   |
| <i>Skap2</i>               | src kinase associated phosphoprotein 2                       | 155183    | 3       |        | 1.2      | 1.6        |                  | 1.8               |
| <i>Slc2a4</i>              | solute carrier family 2 member 4                             | 25139     | 3       | 2.7    | 1.8      | 2.3        |                  |                   |
| <i>Slit2</i>               | slit guidance ligand 2                                       | 360272    | 3       |        | 2.5      | 3.4        | 2.3              | 4.0               |
| <i>Snd1</i>                | staphylococcal nuclease and tudor domain containing 1        | 64635     | 3       | 1.2    | -1.3     | 1.3        |                  | 1.3               |
| <i>Sox9</i>                | SRY box 9                                                    | 140586    | 3       |        | 1.6      | 3.8        | 1.3              |                   |
| <i>Tagln</i>               | transgelin                                                   | 25123     | 3       | 1.9    | 1.4      | 1.4        |                  |                   |
| <i>Tfap2a</i>              | transcription factor AP-2 alpha                              | 306862    | 3       |        | 1.9      | 1.5        | 1.4              |                   |
| <i>Tfap2b</i>              | transcription factor AP-2 beta                               | 301285    | 3       |        | 13.5     | 33.1       | 13.9             | 9.0               |
| <i>Tgfb1</i>               | transforming growth factor, beta induced                     | 116487    | 3       |        | 4.3      | 3.3        | 2.6              | 2.4               |
| <i>Tmem150c</i>            | transmembrane protein 150C                                   | 360916    | 3       |        | 14.1     | 1.3        | 21.1             | 12.4              |
| <i>Tmem26</i>              | transmembrane protein 26                                     | 309724    | 3       |        | 1.4      | 1.5        |                  | 1.9               |
| <i>Tnn</i>                 | tenascin N                                                   | 304913    | 3       |        | 5.0      | 3.4        | 11.5             | 3.3               |
| <i>Tom11l</i>              | target of myb1 like 1 membrane trafficking protein           | 287622    | 3       |        | 1.4      | 1.3        | 1.5              |                   |

<sup>1</sup>Genes in blue have previously been identified as important for DA function in the literature

<sup>2</sup>Bokenkamp *et al.* is divided by SMC and EC in accordance with this study's experimental design

**Table S2 Genes Enriched in the Rodent Aorta by Three or More Microarrays (Fold Change (FC); DA vs Ao)**

| Gene Symbol <sup>1,2</sup> | Gene Name                                                            | Entrez ID | Study # | Jin FC | Hseih FC | Shelton FC | Bokenkamp SMC FC | Bokenkamp Endo FC |
|----------------------------|----------------------------------------------------------------------|-----------|---------|--------|----------|------------|------------------|-------------------|
| <i>Add3</i>                | adducin 3                                                            | 25230     | 4       | -1.8   | -1.9     | -1.5       | -2.2             |                   |
| <i>Akap1</i>               | A-kinase anchoring protein 1                                         | 114124    | 4       | -1.5   | -1.3     | -1.3       |                  | -1.2              |
| <i>Cpq</i>                 | carboxypeptidase Q                                                   | 58952     | 4       | -1.8   | -1.6     | -1.3       | -1.8             | -1.8              |
| <i>Golgb1</i>              | golgin B1                                                            | 192243    | 4       | -1.2   | -1.4     | -1.2       | -1.7             |                   |
| <i>Igfbp6</i>              | insulin-like growth factor binding protein 6                         | 25641     | 4       | -1.7   | -2.1     | -2.9       | -1.6             |                   |
| <i>Itga7</i>               | integrin subunit alpha 7                                             | 81008     | 4       | -1.4   | -2.3     | -2.3       | -1.5             | -1.3              |
| <i>Pdgfra</i>              | platelet derived growth factor receptor alpha                        | 25267     | 4       | -1.9   | -2.2     | -1.7       | -3.6             |                   |
| <i>Rrad</i>                | RRAD, Ras related glycolysis inhibitor and calcium channel regulator | 83521     | 4       | -1.4   | -2.0     | -2.0       |                  | -1.8              |
| <i>Slc6a9</i>              | solute carrier family 6 member 9                                     | 116509    | 4       | -3.4   | -2.1     | -1.3       |                  | -1.4              |
| <i>Syt7</i>                | synaptotagmin 7                                                      | 59267     | 4       | -1.4   | -1.7     | -1.5       |                  | -1.3              |
| <i>Abhd14a</i>             | abhydrolase domain containing 14A                                    | 300982    | 3       |        | -1.2     | -1.3       | -1.3             | -1.3              |
| <i>Acsf5</i>               | acyl-CoA synthetase long-chain family member 5                       | 94340     | 3       | -1.7   | -1.5     | -1.2       |                  |                   |
| <i>Adam33</i>              | ADAM metallopeptidase domain 33                                      | 311425    | 3       |        | -1.6     | -1.3       |                  | -1.8              |
| <i>Adamts15</i>            | ADAMTS-like 5                                                        | 314626    | 3       |        | -1.2     | -1.9       |                  | -1.5              |
| <i>Adcy4</i>               | adenylate cyclase 4                                                  | 54223     | 3       | -1.4   |          | -1.4       | -1.9             |                   |
| <i>Adcy9</i>               | adenylate cyclase 9                                                  | 302950    | 3       |        | -1.3     | -1.3       |                  | -1.6              |
| <i>Adgrd1</i>              | adhesion G protein-coupled receptor D1                               | 689257    | 3       |        | -1.9     | -1.8       |                  | -1.5              |
| <i>Agap1</i>               | ArfGAP with GTPase domain, ankyrin repeat and PH domain 1            | 316611    | 3       |        | -1.3     | -1.7       |                  | -1.4              |
| <i>Agtr2</i>               | angiotensin II receptor, type 2                                      | 24182     | 3       | -1.3   | -1.6     | 1.7        | -3.8             |                   |
| <i>Aig1</i>                | androgen-induced 1                                                   | 292486    | 3       |        | -1.9     | -1.8       | -1.6             |                   |
| <i>Akap6</i>               | A-kinase anchoring protein 6                                         | 64553     | 3       |        | -1.8     | -3.9       |                  | -1.3              |
| <i>Alcam</i>               | activated leukocyte cell adhesion molecule                           | 79559     | 3       |        | -1.9     | -2.2       | -1.7             |                   |
| <i>Alx1</i>                | ALX homeobox 1                                                       | 25401     | 3       | -1.2   |          | -3.3       |                  | -1.3              |
| <i>Amigo2</i>              | adhesion molecule with Ig like domain 2                              | 300186    | 3       |        | -1.2     | -3.2       |                  | -1.6              |
| <i>Ampd2</i>               | adenosine monophosphate deaminase 2                                  | 362015    | 3       |        | -1.4     | -1.4       | -1.3             |                   |
| <i>Ank2</i>                | ankyrin 2                                                            | 362036    | 3       |        | -2.1     | -1.3       | -2.4             | -2.2              |
| <i>Arhgap44</i>            | Rho GTPase activating protein 44                                     | 303222    | 3       |        | -1.8     | -1.4       | -1.6             |                   |
| <i>B4galt2</i>             | beta-1,4-galactosyltransferase 2                                     | 313536    | 3       |        | -1.3     | -1.2       | -1.3             |                   |
| <i>Bcar3</i>               | breast cancer anti-estrogen resistance 3                             | 310838    | 3       |        | -1.5     | -3.3       | -2.1             |                   |
| <i>Bche</i>                | butyrylcholinesterase                                                | 65036     | 3       |        | -2.4     | -2.0       | -2.0             |                   |
| <i>Bdkrb2</i>              | bradykinin receptor B2                                               | 25245     | 3       | -3.4   | -1.5     |            |                  | -1.3              |
| <i>C2cd2</i>               | C2 calcium-dependent domain containing 2                             | 304055    | 3       |        | -1.5     | -1.6       |                  | -1.5              |
| <i>Calml4</i>              | calmodulin-like 4                                                    | 691455    | 3       | -2.1   | -2.9     |            |                  | -2.1              |
| <i>Casq2</i>               | calsequestrin 2                                                      | 29209     | 3       | -2.4   | -3.5     |            | -2.1             | -2.1              |
| <i>Cdh13</i>               | cadherin 13                                                          | 192248    | 3       |        | -3.0     | -3.3       | -1.9             | -2.5              |
| <i>Cdh6</i>                | cadherin 6                                                           | 25409     | 3       |        | -2.3     | -3.4       |                  | -1.4              |
| <i>Cdk6</i>                | cyclin-dependent kinase 6                                            | 114483    | 3       |        | -1.3     | -1.9       |                  | -1.3              |
| <i>Cnm2</i>                | cyclin and CBS domain divalent metal cation transport mediator 2     | 294014    | 3       |        | -1.8     | -1.5       |                  | -1.7              |
| <i>Col11a1</i>             | collagen type XI alpha 1 chain                                       | 25654     | 3       | -1.7   | -2.1     | 4.1        | -3.8             |                   |
| <i>Col3a1</i>              | collagen type III alpha 1 chain                                      | 84032     | 3       |        | -1.6     | -1.3       | -2.0             |                   |
| <i>Col5a2</i>              | collagen type V alpha 2 chain                                        | 85250     | 3       |        | -1.9     | -1.3       | -1.3             |                   |
| <i>Col6a3</i>              | collagen type VI alpha 3 chain                                       | 367313    | 3       |        | -1.9     | -1.4       | -2.5             |                   |
| <i>Corin</i>               | corin, serine peptidase                                              | 289596    | 3       |        | -4.2     | -5.1       |                  | -2.3              |
| <i>Cpd</i>                 | carboxypeptidase D                                                   | 25306     | 3       | -1.8   | -1.6     | -1.3       |                  |                   |
| <i>Cped1</i>               | cadherin-like and PC-esterase domain containing 1                    | 500046    | 3       |        | -2.0     | -2.6       | -1.7             |                   |
| <i>Cplx2</i>               | complexin 2                                                          | 116657    | 3       | -1.4   |          | -1.3       |                  | -1.4              |
| <i>Csf1</i>                | colony stimulating factor 1                                          | 78965     | 3       |        | -2.0     | -1.9       | -1.4             | -1.3              |
| <i>Cxcl13</i>              | C-X-C motif chemokine ligand 13                                      | 498335    | 3       | -5.4   | -1.6     |            | -2.7             |                   |
| <i>Cyth3</i>               | cytohesin 3                                                          | 116693    | 3       |        | -2.3     | -1.4       | -1.7             | -1.3              |
| <i>Dcn</i>                 | decorin                                                              | 29139     | 3       | -1.9   |          | -1.3       | -4.1             | 2.4               |
| <i>Dhtkd1</i>              | dehydrogenase E1 and transketolase domain containing 1               | 361272    | 3       |        | -1.4     | -1.3       | -1.7             |                   |
| <i>Dpysl3</i>              | dihydropyrimidinase-like 3                                           | 25418     | 3       | -14.2  | -1.4     | 1.7        |                  | -1.3              |
| <i>Ebf1</i>                | early B-cell factor 1                                                | 116543    | 3       |        | -1.4     | -1.5       | -2.0             | -1.5              |
| <i>Fam13a</i>              | family with sequence similarity 13, member A                         | 362378    | 3       |        | -1.9     | -1.4       | -1.5             |                   |
| <i>Fam20c</i>              | FAM20C, golgi associated secretory pathway kinase                    | 304334    | 3       |        | -2.0     | -1.4       | -1.4             | -1.6              |
| <i>Fchsd2</i>              | FCH and double SH3 domains 2                                         | 308864    | 3       |        | -1.6     | -1.3       |                  | -1.3              |
| <i>Fgf2</i>                | fibroblast growth factor 2                                           | 54250     | 3       |        | -1.4     | -1.5       |                  | -1.3              |
| <i>Fmo2</i>                | flavin containing monooxygenase 2                                    | 246245    | 3       |        | -2.9     | -3.0       |                  | -1.8              |
| <i>Foxc1</i>               | forkhead box C1                                                      | 364706    | 3       |        | -1.4     | -1.5       |                  | -1.3              |
| <i>Frm4b</i>               | FERM domain containing 4B                                            | 252858    | 3       | -2.0   | -1.7     | -1.9       |                  |                   |
| <i>Frm6</i>                | FERM domain containing 6                                             | 257646    | 3       |        | -1.7     | -1.5       | -1.4             |                   |
| <i>Galm</i>                | galactose mutarotase                                                 | 313843    | 3       |        | -1.2     | -1.5       |                  | -1.4              |
| <i>Galt</i>                | galactose-1-phosphate uridylyltransferase                            | 298003    | 3       |        | -1.3     | -1.2       | -1.3             |                   |
| <i>Gas7</i>                | growth arrest specific 7                                             | 85246     | 3       |        | -2.6     | -1.9       | -1.8             |                   |
| <i>Gdf10</i>               | growth differentiation factor 10                                     | 79216     | 3       | -1.9   | -1.4     |            | -1.8             |                   |
| <i>Gfra2</i>               | GDNF family receptor alpha 2                                         | 25136     | 3       | -2.0   | -3.7     | -1.4       |                  |                   |
| <i>Glis2</i>               | GLIS family zinc finger 2                                            | 302946    | 3       |        | -1.3     | -1.5       | -1.4             | -1.2              |

**Table S2 Genes Enriched in the Rodent Aorta by Three or More Microarrays (Fold Change (FC); DA vs Ao)**  
(cont.)

| Gene Symbol <sup>1,2</sup> | Gene Name                                                            | Entrez ID | Study # | Jin FC | Hseih FC | Shelton FC | Bokenkamp SMC FC | Bokenkamp Endo FC |
|----------------------------|----------------------------------------------------------------------|-----------|---------|--------|----------|------------|------------------|-------------------|
| <i>Glt8d2</i>              | glycosyltransferase 8 domain containing 2                            | 366859    | 3       |        | -1.5     | -2.0       | -1.2             |                   |
| <i>Grasp</i>               | general receptor for phosphoinositides 1 associated scaffold protein | 192254    | 3       |        | -1.5     | -1.9       |                  | -1.3              |
| <i>Grb14</i>               | growth factor receptor bound protein 14                              | 58844     | 3       |        | -1.6     | -2.3       | -1.8             | -1.7              |
| <i>Grip2</i>               | glutamate receptor interacting protein 2                             | 171571    | 3       | -1.8   | -1.7     | -2.7       |                  |                   |
| <i>Gstk1</i>               | glutathione S-transferase kappa 1                                    | 297029    | 3       |        | -1.5     | -1.8       | -1.5             | -1.3              |
| <i>Hapln1</i>              | hyaluronan and proteoglycan link protein 1                           | 29331     | 3       |        | -1.4     | -2.0       |                  | -1.5              |
| <i>Herc3</i>               | HECT and RLD domain containing E3 ubiquitin protein ligase 3         | 362377    | 3       |        | -1.3     | -1.3       | -2.0             |                   |
| <i>Heyl</i>                | hes-related family bHLH transcription factor with YRPW motif-like    | 313575    | 3       |        | -2.0     | -1.9       |                  | -1.7              |
| <i>Hmgcs2</i>              | 3-hydroxy-3-methylglutaryl-CoA synthase 2                            | 24450     | 3       | -10.4  | -2.2     |            |                  | -1.3              |
| <i>Hpcal4</i>              | hippocalcin-like 4                                                   | 50872     | 3       | -2.3   | -2.4     |            | -2.2             | -1.3              |
| <i>Igf1r</i>               | insulin-like growth factor 1 receptor                                | 25718     | 3       | -1.5   | -1.3     |            | -1.7             | -1.4              |
| <i>Igf2bp2</i>             | insulin-like growth factor 2 mRNA binding protein 2                  | 303824    | 3       |        | -1.3     | -1.2       | -1.3             |                   |
| <i>Igfbp2</i>              | insulin-like growth factor binding protein 2                         | 25662     | 3       | -3.7   | -2.6     | 6.2        | -1.9             |                   |
| <i>Igsf3</i>               | immunoglobulin superfamily, member 3                                 | 295325    | 3       |        | -1.7     | -1.3       | -2.0             |                   |
| <i>Inpp5k</i>              | inositol polyphosphate-5-phosphatase K                               | 287533    | 3       |        | -1.3     | -1.4       |                  | -1.2              |
| <i>Kcnma1</i>              | potassium calcium-activated channel subfamily M alpha 1              | 83731     | 3       | -5.9   | -2.4     | 2.1        | -2.5             | -4.2              |
| <i>Kcnq1</i>               | potassium voltage-gated channel subfamily Q member 1                 | 84020     | 3       | -1.8   | -2.2     |            |                  | -1.7              |
| <i>Kif3a</i>               | kinesin family member 3a                                             | 84392     | 3       |        | -1.2     | -1.5       | -1.3             |                   |
| <i>Klf15</i>               | Kruppel-like factor 15                                               | 85497     | 3       |        | -1.6     | -2.2       | -1.7             | -1.8              |
| <i>Krt8</i>                | keratin 8                                                            | 25626     | 3       | -2.0   | -3.6     | -1.8       |                  |                   |
| <i>Lama4</i>               | laminin subunit alpha 4                                              | 309816    | 3       |        | -1.6     | -1.5       | -1.3             |                   |
| <i>Lamb1</i>               | laminin subunit beta 1                                               | 298941    | 3       |        | -2.0     | -2.0       | -1.8             |                   |
| <i>Laptm4b</i>             | lysosomal protein transmembrane 4 beta                               | 315047    | 3       |        | -1.3     | -1.7       | -1.3             |                   |
| <i>Lbh</i>                 | limb bud and heart development                                       | 683626    | 3       |        | -1.3     | -2.2       | -1.5             |                   |
| <i>Ldhb</i>                | lactate dehydrogenase B                                              | 24534     | 3       | -1.4   | -1.6     |            | -1.7             |                   |
| <i>Lhfp2</i>               | lipoma HMGIC fusion partner-like 2                                   | 294643    | 3       |        | -1.6     | -1.7       | -1.7             |                   |
| <i>Lifr</i>                | leukemia inhibitory factor receptor alpha                            | 81680     | 3       |        | -1.8     | -1.3       |                  | -1.3              |
| <i>Limd1</i>               | LIM domains containing 1                                             | 316101    | 3       |        | -1.6     | -1.6       |                  | -1.2              |
| <i>Lingo1</i>              | leucine rich repeat and Ig domain containing 1                       | 315691    | 3       |        | -1.6     | -1.7       | -1.5             | -2.2              |
| <i>Lox</i>                 | lysyl oxidase                                                        | 24914     | 3       | -1.8   | -1.4     |            | -1.5             |                   |
| <i>Lox1</i>                | lysyl oxidase-like 1                                                 | 315714    | 3       | -1.3   | -2.0     |            | -2.0             |                   |
| <i>Lrrfp1</i>              | LRR binding FLII interacting protein 1                               | 367314    | 3       |        | -1.4     | -1.3       | -1.4             | -1.4              |
| <i>Lrtm2</i>               | leucine-rich repeats and transmembrane domains 2                     | 680883    | 3       |        | -1.2     | -1.3       | -1.4             |                   |
| <i>Ltbp2</i>               | latent transforming growth factor beta binding protein 2             | 59106     | 3       | -1.9   | -2.1     | 1.7        | -1.7             |                   |
| <i>Map2</i>                | microtubule-associated protein 2                                     | 25595     | 3       | -3.6   | -4.8     |            | -3.7             |                   |
| <i>Matn2</i>               | matrilin 2                                                           | 299996    | 3       |        | -2.0     | -1.3       | -1.7             | -1.8              |
| <i>Meis2</i>               | Meis homeobox 2                                                      | 311311    | 3       |        | -1.5     | -1.7       | -1.5             |                   |
| <i>Mfhas1</i>              | malignant fibrous histiocytoma amplified sequence1                   | 306508    | 3       |        | -1.3     | -1.7       | -1.4             |                   |
| <i>Mobp</i>                | myelin-associated oligodendrocyte basic protein                      | 25037     | 3       | -2.2   | -1.6     |            | -1.6             | -1.6              |
| <i>Mtdh</i>                | metadherin                                                           | 170910    | 3       | -1.6   | -1.4     |            | -1.3             | 1.2               |
| <i>Mtus1</i>               | microtubule associated tumor suppressor 1                            | 306487    | 3       |        | -2.5     | -1.9       | -2.4             |                   |
| <i>Mtus2</i>               | microtubule associated tumor suppressor candidate2                   | 498136    | 3       |        | -2.4     | -3.5       | -1.9             | -3.4              |
| <i>Mycbp2</i>              | MYC binding protein 2, E3 ubiquitin protein ligase                   | 290447    | 3       |        | -1.3     | -1.3       | -1.3             |                   |
| <i>Myh10</i>               | myosin heavy chain 10                                                | 79433     | 3       | -7.5   | -1.2     | -1.3       |                  |                   |
| <i>Myo1d</i>               | myosin ID                                                            | 25485     | 3       |        | -2.2     | -1.5       | -1.6             |                   |
| <i>Ndrp2</i>               | NDRG family member 2                                                 | 171114    | 3       |        | -1.7     | -1.5       |                  | -1.8              |
| <i>Nf2</i>                 | neurofibromin 2                                                      | 25744     | 3       |        | -1.3     | -1.6       |                  | -1.2              |
| <i>Nid1</i>                | nidogen 1                                                            | 25494     | 3       |        | -1.5     | -1.8       | -1.6             |                   |
| <i>Nid2</i>                | nidogen 2                                                            | 302248    | 3       |        | -2.0     | -2.3       | -2.2             | -1.7              |
| <i>Nrarp</i>               | Notch-regulated ankyrin repeat protein                               | 499745    | 3       |        | -1.8     | -1.6       |                  | -1.4              |
| <i>Ntrk2</i>               | neurotrophic receptor tyrosine kinase 2                              | 25054     | 3       |        | -2.1     | -1.2       | -4.3             |                   |
| <i>Ntrk3</i>               | neurotrophic receptor tyrosine kinase 3                              | 29613     | 3       | 1.4    | -1.3     | -2.9       | -1.9             | -1.8              |
| <i>P4ha2</i>               | prolyl 4-hydroxylase subunit alpha 2                                 | 360526    | 3       |        | -1.5     | -1.3       | -1.5             | -1.3              |
| <i>Pck2</i>                | phosphoenolpyruvate carboxykinase 2 (mitochondrial)                  | 361042    | 3       |        | -1.5     | -1.4       | -1.8             | -1.6              |
| <i>Pde1c</i>               | phosphodiesterase 1C                                                 | 81742     | 3       | -2.4   | -1.3     | -2.9       |                  |                   |
| <i>Pdlim5</i>              | PDZ and LIM domain 5                                                 | 64353     | 3       | -2.3   | -1.3     | -1.4       |                  |                   |
| <i>Phkg1</i>               | phosphorylase kinase, gamma 1                                        | 29353     | 3       | -4.2   |          | -3.4       |                  | -1.2              |
| <i>Pld1</i>                | phospholipase D1                                                     | 25096     | 3       |        | -1.5     | -1.7       |                  | -1.7              |
| <i>Plpp3</i>               | phospholipid phosphatase 3                                           | 192270    | 3       | -1.6   | -1.7     |            | -2.0             |                   |
| <i>Polg</i>                | DNA polymerase gamma, catalytic subunit                              | 85472     | 3       |        | -1.3     | -1.2       |                  | -1.3              |
| <i>Postn</i>               | periostin                                                            | 361945    | 3       | -2.5   | -3.8     |            | -2.7             |                   |
| <i>Ppp1r9a</i>             | protein phosphatase 1, regulatory subunit 9A                         | 84685     | 3       |        | -1.5     | -1.7       |                  | -2.1              |
| <i>Prrc1</i>               | proline-rich coiled-coil 1                                           | 291444    | 3       |        | -1.3     | -1.5       | -1.3             |                   |
| <i>Ptger3</i>              | prostaglandin E receptor 3                                           | 24929     | 3       | -3.5   | -1.9     |            | -2.4             | -1.3              |

**Table S2** Genes Enriched in the Rodent Aorta by Three or More Microarrays (Fold Change (FC); DA vs Ao)  
(cont.)

| Gene Symbol <sup>1,2</sup> | Gene Name                                                                                         | Entrez ID | Study # | Jin FC | Hseih FC | Shelton FC | Bokenkamp SMC FC | Bokenkamp Endo FC |
|----------------------------|---------------------------------------------------------------------------------------------------|-----------|---------|--------|----------|------------|------------------|-------------------|
| <i>Ptprd</i>               | protein tyrosine phosphatase, receptor type, D                                                    | 313278    | 3       |        | -1.7     | -1.6       | -2.0             | -1.7              |
| <i>Qpct</i>                | glutaminy-peptide cyclotransferase                                                                | 313837    | 3       | -1.6   | -1.3     | 1.3        | -2.4             |                   |
| <i>Rab3ip</i>              | RAB3A interacting protein                                                                         | 29885     | 3       |        | -3.6     | -1.3       | -3.6             | -3.1              |
| <i>Rab7b</i>               | Rab7b, member RAS oncogene family                                                                 | 501854    | 3       |        | -2.3     | -2.8       | -1.5             | -1.7              |
| <i>Ramp1</i>               | receptor activity modifying protein 1                                                             | 58965     | 3       |        | -1.7     | -3.0       | -1.4             |                   |
| <i>Rarb</i>                | retinoic acid receptor, beta                                                                      | 24706     | 3       |        | -1.3     | -1.5       | -2.0             |                   |
| <i>Rarres2</i>             | retinoic acid receptor responder 2                                                                | 297073    | 3       |        | -1.8     | -2.5       | -1.7             | -1.5              |
| <i>Rasd2</i>               | RASD family, member 2                                                                             | 171099    | 3       |        | -1.3     | -2.6       |                  | -1.3              |
| <i>Rassf9</i>              | Ras association domain family member 9                                                            | 65053     | 3       | -2.6   | -2.4     | -1.8       |                  |                   |
| <i>Rbm6</i>                | RNA binding motif protein 6                                                                       | 315997    | 3       |        | -1.3     | -1.2       | -1.3             |                   |
| <i>Rhoj</i>                | ras homolog family member J                                                                       | 299145    | 3       |        | -1.4     | -1.2       |                  | -1.3              |
| <i>Rif1</i>                | replication timing regulatory factor 1                                                            | 295602    | 3       |        | -1.5     | -1.3       | -1.5             |                   |
| <i>Ryr2</i>                | ryanodine receptor 2                                                                              | 689560    | 3       |        | -1.3     | -1.7       |                  | -2.5              |
| <i>Sash1</i>               | SAM and SH3 domain containing 1                                                                   | 365037    | 3       |        | -2.1     | -1.7       | -2.5             |                   |
| <i>Scarf1</i>              | scavenger receptor class F, member 1                                                              | 303313    | 3       |        | -1.4     | -1.3       |                  | -1.3              |
| <i>Scube3</i>              | signal peptide, CUB domain and EGF like domain containing 3                                       | 294297    | 3       |        | -2.1     | -1.5       |                  | -2.3              |
| <i>Sema5a</i>              | semaphorin 5A                                                                                     | 310207    | 3       |        | -1.5     | -2.0       | -1.4             |                   |
| <i>Sema6d</i>              | semaphorin 6D                                                                                     | 311384    | 3       |        | -2.2     | -1.4       | -1.9             |                   |
| <i>Sept8</i>               | septin 8                                                                                          | 303135    | 3       |        | -1.3     |            | -2.1             | -1.3              |
| <i>Sh3pxd2a</i>            | SH3 and PX domains 2A                                                                             | 309460    | 3       |        | -1.6     | -1.2       | -1.9             | -1.9              |
| <i>Sipa1l2</i>             | signal-induced proliferation-associated 1 like 2                                                  | 361442    | 3       |        | -1.6     | -1.3       |                  | -1.5              |
| <i>Slc1a4</i>              | solute carrier family 1 member 4                                                                  | 305540    | 3       |        | -1.9     | -1.6       |                  | -1.6              |
| <i>Slc24a3</i>             | solute carrier family 24 member 3                                                                 | 85267     | 3       |        | -1.5     | -2.0       | -2.1             | -1.8              |
| <i>Slc44a1</i>             | solute carrier family 44 member 1                                                                 | 85254     | 3       |        | -1.5     | -1.2       | -1.4             |                   |
| <i>Slc7a3</i>              | solute carrier family 7 member 3                                                                  | 29485     | 3       | -2.5   | -6.3     |            | -4.1             | -2.9              |
| <i>Slc9a3r2</i>            | SLC9A3 regulator 2                                                                                | 116501    | 3       |        | -1.4     | -1.8       |                  | -1.2              |
| <i>Slx4ip</i>              | SLX4 interacting protein                                                                          | 499895    | 3       |        | -1.4     | -1.4       | -1.3             |                   |
| <i>Smarca2</i>             | SWI/SNF related, matrix associated, actin dependent regulator of chromatin, subfamily a, member 2 | 361745    | 3       |        | -1.7     | -1.3       |                  | -1.6              |
| <i>Smpd3</i>               | sphingomyelin phosphodiesterase 3                                                                 | 94338     | 3       |        | -2.0     | -1.9       | -1.7             |                   |
| <i>Snta1</i>               | syntrophin, alpha 1                                                                               | 362242    | 3       |        | -1.8     | -1.9       | -1.5             |                   |
| <i>Sod2</i>                | superoxide dismutase 2                                                                            | 24787     | 3       | -1.8   | -1.3     | -1.3       |                  |                   |
| <i>Sorbs3</i>              | sorbin and SH3 domain containing 3                                                                | 282843    | 3       |        | -1.4     | -1.4       |                  | -1.4              |
| <i>Specc1</i>              | sperm antigen with calponin homology and coiled-coil domains 1                                    | 303208    | 3       |        | -2.1     | -1.5       | -2.3             | -1.5              |
| <i>Sphkap</i>              | SPHK1 interactor, AKAP domain containing                                                          | 316561    | 3       |        | -2.7     | -3.8       |                  | -2.0              |
| <i>Spock2</i>              | SPARC/osteonectin, cwcv and kazal like domains proteoglycan 2                                     | 361840    | 3       | -2.8   | -1.3     | -2.0       |                  |                   |
| <i>Spon1</i>               | spondin 1                                                                                         | 64456     | 3       | -1.6   | -1.9     | -4.2       |                  |                   |
| <i>St3gal3</i>             | ST3 beta-galactoside alpha-2,3-sialyltransferase 3                                                | 64445     | 3       | -1.5   | -1.2     |            | -1.4             |                   |
| <i>Stc1</i>                | stanniocalcin 1                                                                                   | 81801     | 3       |        | -2.9     | -3.9       | -2.3             | -1.9              |
| <i>Stmn4</i>               | stathmin 4                                                                                        | 79423     | 3       | -1.6   | -3.0     |            |                  | -2.1              |
| <i>Stx1a</i>               | syntaxin 1A                                                                                       | 116470    | 3       |        | -1.6     | -2.0       | -1.7             | -1.4              |
| <i>Stx3</i>                | syntaxin 3                                                                                        | 81802     | 3       |        | -1.4     | -2.1       |                  | -1.3              |
| <i>Sult1a1</i>             | sulfotransferase family 1A member 1                                                               | 83783     | 3       | -3.1   | -2.6     |            | -2.0             |                   |
| <i>Tbx18</i>               | T-box18                                                                                           | 315870    | 3       |        | -1.2     | -1.9       | -2.4             |                   |
| <i>Tet1</i>                | tet methylcytosine dioxygenase 1                                                                  | 309902    | 3       |        | -1.3     | -1.6       | -1.9             |                   |
| <i>Tgfb2</i>               | transforming growth factor, beta receptor 2                                                       | 81810     | 3       |        | -2.1     | -1.6       |                  | -1.2              |
| <i>Thbs2</i>               | thrombospondin 2                                                                                  | 292406    | 3       |        | -1.7     | -1.8       | -2.0             |                   |
| <i>Timp4</i>               | tissue inhibitor of metalloproteinase 4                                                           | 680130    | 3       |        | -2.8     | -5.0       | -1.5             | -1.7              |
| <i>Tmem117</i>             | transmembrane protein 117                                                                         | 500921    | 3       |        | -1.7     | -2.3       | -1.6             |                   |
| <i>Tmx4</i>                | thioredoxin-related transmembrane protein 4                                                       | 296182    | 3       |        | -1.9     | -1.4       |                  | -1.4              |
| <i>Traf3</i>               | Tnf receptor-associated factor 3                                                                  | 362788    | 3       |        | -1.5     | -1.2       | -1.4             |                   |
| <i>Trim47</i>              | tripartite motif-containing 47                                                                    | 690374    | 3       |        | -1.4     | -1.8       |                  | -1.3              |
| <i>Tspan5</i>              | tetraspanin 5                                                                                     | 362048    | 3       |        | -1.7     | -2.3       | -1.3             |                   |
| <i>Tub</i>                 | tubby bipartite transcription factor                                                              | 25609     | 3       | -3.3   |          | -1.5       | -1.5             |                   |
| <i>Usp54</i>               | ubiquitin specific peptidase 54                                                                   | 408223    | 3       |        | -1.6     | -1.3       | -1.6             |                   |
| <i>Vasn</i>                | vasorin                                                                                           | 679921    | 3       |        | -1.5     | -1.6       | -1.4             |                   |
| <i>Vstm4</i>               | V-set and transmembrane domain containing 4                                                       | 361112    | 3       |        | -1.4     | -1.6       | -2.3             |                   |
| <i>Xirp1</i>               | xin actin-binding repeat containing 1                                                             | 100910104 | 3       |        | -2.3     | -2.3       |                  | -1.7              |
| <i>Zmiz1</i>               | zinc finger, MIZ-type containing 1                                                                | 361103    | 3       | -4.8   | -1.2     |            | -1.3             |                   |

<sup>1</sup>Genes in blue have previously been identified as important for DA function in the literature

<sup>2</sup>Bokenkamp *et al.* is divided by SMC and EC in accordance with this study's experimental design

**Table S3 Summary of Transcript<sup>1</sup> Reads**

| <b>Sample</b> | <b>Vessel</b> | <b>Transcript Reads</b> | <b>Exonic Reads</b> | <b>Intronic Reads</b> | <b>Intergenic Reads</b> |
|---------------|---------------|-------------------------|---------------------|-----------------------|-------------------------|
| 122           | Ao            | 26761371                | 48.28%              | 35.60%                | 6.85%                   |
| 122           | DA            | 28415074                | 43.54%              | 28.42%                | 18.13%                  |
| 134           | Ao            | 49240999                | 58.16%              | 24.76%                | 6.51%                   |
| 134           | DA            | 44456169                | 49.42%              | 33.93%                | 7.36%                   |
| 162           | Ao            | 65157040                | 30.93%              | 52.77%                | 8.91%                   |
| 162           | DA            | 56289111                | 32.26%              | 51.34%                | 8.43%                   |
| 208           | Ao            | 73200814                | 29.42%              | 54.20%                | 8.28%                   |
| 208           | DA            | 75899608                | 32.84%              | 50.83%                | 8.16%                   |
| <b>Mean</b>   |               | <b>52427523</b>         | <b>40.61%</b>       | <b>41.48%</b>         | <b>9.08%</b>            |

<sup>1</sup> Transcriptome reads aligned to RefSeq Transcripts 83

Table S4

## Genes Enriched in the Human DA by RNA-seq (Fold Change; DA vs Ao)

| Gene Symbol         | Gene Name                                                              | Fold Change | P-value  | FDR      | FPKM DA | FPK M Ao | Entrez ID |
|---------------------|------------------------------------------------------------------------|-------------|----------|----------|---------|----------|-----------|
| <i>GRM1</i>         | glutamate metabotropic receptor 1                                      | 57.9        | 1.26E-06 | 3.98E-03 | 0.97    | 0.02     | 2911      |
| <i>FENDRR</i>       | FOXF1 adjacent non-coding developmental regulatory RNA                 | 45.1        | 1.21E-07 | 1.60E-03 | 2.47    | 0.05     | 400550    |
| <i>WFDC1</i>        | WAP four-disulfide core domain 1                                       | 40.2        | 1.64E-05 | 1.51E-02 | 0.89    | 0.02     | 58189     |
| <i>FSTL5</i>        | folliculin like 5                                                      | 39.4        | 6.78E-05 | 3.14E-02 | 2.74    | 0.07     | 56884     |
| <i>TFAP2B</i>       | transcription factor AP-2 beta                                         | 37.9        | 1.94E-07 | 1.73E-03 | 3.49    | 0.09     | 7021      |
| <i>ADAP1</i>        | ArfGAP with dual PH domains 1                                          | 36.7        | 9.70E-06 | 1.24E-02 | 0.72    | 0.02     | 11033     |
| <i>PCDH11Y</i>      | protocadherin 11 Y-linked                                              | 33.6        | 1.14E-04 | 4.04E-02 | 0.48    | 0.01     | 83259     |
| <i>PDE1C</i>        | phosphodiesterase 1C                                                   | 33.2        | 3.97E-06 | 7.85E-03 | 0.43    | 0.01     | 5137      |
| <i>NRXN3</i>        | neurexin 3                                                             | 32.7        | 3.66E-04 | 7.57E-02 | 0.58    | 0.02     | 9369      |
| <i>VTCN1</i>        | V-set domain containing T-cell activation inhibitor 1                  | 31.9        | 2.63E-04 | 6.08E-02 | 0.18    | 0.01     | 79679     |
| <i>ASIC2</i>        | acid sensing ion channel subunit 2                                     | 31.5        | 3.48E-05 | 2.24E-02 | 1.72    | 0.05     | 40        |
| <i>GALNT14</i>      | polypeptide N-acetylgalactosaminyltransferase 14                       | 29.9        | 4.76E-04 | 8.77E-02 | 0.08    | 0.00     | 79623     |
| <i>CLEC3A</i>       | C-type lectin domain family 3 member A                                 | 29.9        | 5.92E-05 | 2.92E-02 | 1.08    | 0.04     | 10143     |
| <i>FOXF1</i>        | forkhead box F1                                                        | 29.4        | 4.37E-07 | 2.17E-03 | 2.74    | 0.09     | 2294      |
| <i>SCUBE1</i>       | signal peptide, CUB domain and EGF like domain containing1             | 28.7        | 1.03E-05 | 1.28E-02 | 0.62    | 0.02     | 80274     |
| <i>VIT</i>          | vitrin                                                                 | 28.5        | 5.35E-04 | 9.42E-02 | 0.63    | 0.02     | 5212      |
| <i>IRS4</i>         | insulin receptor substrate 4                                           | 26.2        | 1.30E-06 | 3.98E-03 | 1.88    | 0.07     | 8471      |
| <i>MAB21L2</i>      | mab-21 like 2                                                          | 25.3        | 2.08E-06 | 5.51E-03 | 16.77   | 0.66     | 10586     |
| <i>ROBO2</i>        | roundabout guidance receptor 2                                         | 24.6        | 1.50E-06 | 4.26E-03 | 5.37    | 0.22     | 6092      |
| <i>KRT17</i>        | keratin 17                                                             | 24.6        | 5.31E-05 | 2.74E-02 | 10.97   | 0.45     | 3872      |
| <i>HECW1</i>        | HECT, C2 and WW domain containing E3 ubiquitin protein ligase 1        | 23.2        | 1.72E-04 | 4.76E-02 | 1.39    | 0.06     | 23072     |
| <i>FLJ30901</i>     | uncharacterized protein FLJ30901                                       | 22.0        | 6.62E-05 | 3.14E-02 | 0.31    | 0.01     | 150378    |
| <i>GLP1R</i>        | glucagon like peptide 1 receptor                                       | 21.9        | 4.65E-04 | 8.65E-02 | 0.85    | 0.04     | 2740      |
| <i>FAM19A1</i>      | family with sequence similarity 19 member A1, C-C motif chemokine like | 20.6        | 7.37E-06 | 1.05E-02 | 8.08    | 0.39     | 407738    |
| <i>PTGER4</i>       | prostaglandin E receptor 4                                             | 20.5        | 9.38E-08 | 1.60E-03 | 21.27   | 1.04     | 5734      |
| <i>SYTL2</i>        | synaptotagmin like 2                                                   | 20.4        | 2.84E-04 | 6.36E-02 | 0.48    | 0.02     | 54843     |
| <i>TNMD</i>         | tenomodulin                                                            | 19.9        | 3.43E-07 | 1.95E-03 | 2.28    | 0.11     | 64102     |
| <i>RBP3</i>         | retinol binding protein 3                                              | 19.7        | 4.56E-05 | 2.57E-02 | 0.53    | 0.03     | 5949      |
| <i>LINC-PINT</i>    | long intergenic non-protein coding RNA, p53 induced transcript         | 19.1        | 2.67E-05 | 2.00E-02 | 0.55    | 0.03     | 378805    |
| <i>CD48</i>         | CD48 molecule                                                          | 17.8        | 2.55E-04 | 5.96E-02 | 0.21    | 0.01     | 962       |
| <i>ANKRD1</i>       | ankyrin repeat domain 1                                                | 16.5        | 1.67E-05 | 1.51E-02 | 2.08    | 0.13     | 27063     |
| <i>UBL7</i>         | ubiquitin like 7                                                       | 16.2        | 3.27E-05 | 2.24E-02 | 0.36    | 0.02     | 84993     |
| <i>ICAM4</i>        | intercellular adhesion molecule 4 (Landsteiner-Wiener blood group)     | 16.1        | 2.21E-04 | 5.58E-02 | 0.12    | 0.01     | 3386      |
| <i>ALKAL1</i>       | ALK And LTK Ligand 1                                                   | 16.1        | 2.22E-04 | 5.58E-02 | 0.43    | 0.03     | 389658    |
| <i>SCTR</i>         | secretin receptor                                                      | 15.1        | 1.05E-04 | 3.90E-02 | 0.14    | 0.01     | 6344      |
| <i>CDH3</i>         | cadherin 3                                                             | 14.0        | 3.93E-04 | 7.86E-02 | 0.33    | 0.02     | 1001      |
| <i>C16orf89</i>     | chromosome 16 open reading frame 89                                    | 14.0        | 1.23E-04 | 4.21E-02 | 2.43    | 0.17     | 146556    |
| <i>ICAM3</i>        | intercellular adhesion molecule 3                                      | 13.8        | 1.93E-04 | 5.10E-02 | 0.10    | 0.01     | 3385      |
| <i>LOC349160</i>    | uncharacterized LOC349160                                              | 13.8        | 1.62E-05 | 1.51E-02 | 1.63    | 0.12     | 349160    |
| <i>PCSK2</i>        | proprotein convertase subtilisin/kexin type 2                          | 13.6        | 6.61E-06 | 1.05E-02 | 3.24    | 0.24     | 5126      |
| <i>GRIN2A</i>       | glutamate ionotropic receptor NMDA type subunit 2A                     | 13.3        | 1.40E-04 | 4.38E-02 | 1.41    | 0.11     | 2903      |
| <i>PCDH11X</i>      | protocadherin 11 X-linked                                              | 13.0        | 2.29E-04 | 5.67E-02 | 0.81    | 0.06     | 27328     |
| <i>S1PR5</i>        | sphingosine-1-phosphate receptor 5                                     | 12.9        | 7.68E-06 | 1.05E-02 | 2.15    | 0.17     | 53637     |
| <i>COL9A1</i>       | collagen type IX alpha 1 chain                                         | 12.6        | 1.61E-04 | 4.71E-02 | 2.33    | 0.18     | 1297      |
| <i>TNC</i>          | tenascin C                                                             | 12.1        | 7.76E-08 | 1.60E-03 | 99.27   | 8.22     | 3371      |
| <i>DGKA</i>         | diacylglycerol kinase alpha                                            | 12.1        | 2.49E-04 | 5.90E-02 | 0.07    | 0.01     | 1606      |
| <i>COL8A2</i>       | collagen type VIII alpha 2 chain                                       | 11.8        | 4.14E-06 | 7.85E-03 | 2.49    | 0.21     | 1296      |
| <i>ICAM5</i>        | intercellular adhesion molecule 5                                      | 11.8        | 1.68E-04 | 4.71E-02 | 0.62    | 0.05     | 7087      |
| <i>DLX1</i>         | distal-less homeobox 1                                                 | 11.5        | 1.69E-04 | 4.71E-02 | 0.63    | 0.05     | 1745      |
| <i>DNAH11</i>       | dynein axonemal heavy chain 11                                         | 9.9         | 1.15E-04 | 4.06E-02 | 0.88    | 0.09     | 8701      |
| <i>RHBDL2</i>       | rhomboid like 2                                                        | 9.9         | 1.33E-04 | 4.26E-02 | 0.76    | 0.08     | 54933     |
| <i>LOC101927069</i> | uncharacterized LOC101927069                                           | 9.6         | 8.80E-05 | 3.54E-02 | 1.07    | 0.11     | 101927069 |
| <i>C1QTNF3</i>      | C1q and tumor necrosis factor related protein 3                        | 9.5         | 1.21E-05 | 1.42E-02 | 20.52   | 2.16     | 114899    |
| <i>CHD5</i>         | chromodomain helicase DNA binding protein 5                            | 9.5         | 3.57E-06 | 7.75E-03 | 2.48    | 0.26     | 26038     |
| <i>DIO2</i>         | iodothyronine deiodinase 2                                             | 9.5         | 1.43E-05 | 1.47E-02 | 2.41    | 0.25     | 1734      |
| <i>MAPK10</i>       | mitogen-activated protein kinase 10                                    | 9.4         | 7.00E-05 | 3.16E-02 | 0.80    | 0.09     | 5602      |
| <i>KCTD16</i>       | potassium channel tetramerization domain containing 16                 | 9.1         | 5.78E-05 | 2.91E-02 | 1.81    | 0.20     | 57528     |
| <i>CHRM2</i>        | cholinergic receptor muscarinic 2                                      | 8.8         | 3.06E-05 | 2.17E-02 | 3.60    | 0.41     | 1129      |
| <i>FOXD1</i>        | forkhead box D1                                                        | 8.7         | 4.48E-05 | 2.57E-02 | 0.73    | 0.08     | 2297      |
| <i>COL19A1</i>      | collagen type XIX alpha 1 chain                                        | 8.7         | 3.70E-05 | 2.27E-02 | 2.50    | 0.29     | 1310      |
| <i>CSGALNACT1</i>   | chondroitin sulfate N-acetylgalactosaminyltransferase 1                | 8.5         | 5.09E-04 | 9.12E-02 | 0.55    | 0.06     | 55790     |
| <i>LINC00643</i>    | long intergenic non-protein coding RNA 643                             | 8.2         | 5.92E-04 | 9.98E-02 | 1.06    | 0.13     | 646113    |
| <i>PKHD1</i>        | polycystic kidney and hepatic disease 1 (autosomal recessive)          | 8.2         | 1.62E-04 | 4.71E-02 | 0.45    | 0.06     | 5314      |
| <i>FOXP1</i>        | forkhead box G1                                                        | 8.1         | 3.08E-04 | 6.76E-02 | 0.18    | 0.02     | 2290      |

|                  |                                        |     |          |          |       |      |        |
|------------------|----------------------------------------|-----|----------|----------|-------|------|--------|
| <i>MEIS1-AS3</i> | MEIS1 antisense RNA 3                  | 7.9 | 1.78E-04 | 4.85E-02 | 0.35  | 0.04 | 730198 |
| <i>NEXMIF</i>    | Neurite Extension And Migration Factor | 7.8 | 7.96E-07 | 3.52E-03 | 11.00 | 1.40 | 340533 |
| <i>DLX2</i>      | distal-less homeobox 2                 | 7.4 | 2.61E-05 | 2.00E-02 | 14.15 | 1.90 | 1746   |

**Table S4  
(Cont.)**

**Genes Enriched in the Human DA by RNA-seq (Fold Change; DA vs Ao)**

| Gene Symbol         | Gene Name                                                                 | Fold Change | P-value  | FDR      | FPKM DA | FPK M Ao | Entrez ID |
|---------------------|---------------------------------------------------------------------------|-------------|----------|----------|---------|----------|-----------|
| <i>MME</i>          | membrane metalloendopeptidase                                             | 7.3         | 7.41E-05 | 3.17E-02 | 0.89    | 0.12     | 4311      |
| <i>WIF1</i>         | WNT inhibitory factor 1                                                   | 7.2         | 1.11E-04 | 3.99E-02 | 0.94    | 0.13     | 11197     |
| <i>LOC100130238</i> | uncharacterized LOC100130238                                              | 7.1         | 5.66E-05 | 2.89E-02 | 0.84    | 0.12     | 100130238 |
| <i>CCDC129</i>      | coiled-coil domain containing 129                                         | 7.0         | 3.81E-05 | 2.29E-02 | 0.96    | 0.14     | 223075    |
| <i>SHISA2</i>       | shisa family member 2                                                     | 6.9         | 3.70E-06 | 7.75E-03 | 6.29    | 0.91     | 387914    |
| <i>INMT</i>         | indolethylamine N-methyltransferase                                       | 6.8         | 7.89E-05 | 3.23E-02 | 23.55   | 3.47     | 11185     |
| <i>JAKMIP2</i>      | janus kinase and microtubule interacting protein 2                        | 6.7         | 2.06E-05 | 1.75E-02 | 2.20    | 0.33     | 9832      |
| <i>HOXC4</i>        | homeobox C4                                                               | 6.7         | 1.37E-05 | 1.47E-02 | 2.72    | 0.41     | 3221      |
| <i>MTCL1</i>        | microtubule crosslinking factor 1                                         | 6.6         | 7.29E-06 | 1.05E-02 | 2.24    | 0.34     | 23255     |
| <i>GLP2R</i>        | glucagon like peptide 2 receptor                                          | 6.6         | 3.84E-04 | 7.77E-02 | 0.37    | 0.06     | 9340      |
| <i>HOXA5</i>        | homeobox A5                                                               | 6.5         | 1.69E-04 | 4.71E-02 | 1.65    | 0.25     | 3202      |
| <i>FAM84A</i>       | family with sequence similarity 84 member A                               | 6.5         | 7.32E-05 | 3.17E-02 | 0.67    | 0.10     | 151354    |
| <i>SYT4</i>         | synaptotagmin 4                                                           | 6.2         | 5.70E-04 | 9.69E-02 | 0.50    | 0.08     | 6860      |
| <i>GIRK1</i>        | glutamate ionotropic receptor kainate type subunit 1                      | 6.2         | 3.71E-04 | 7.61E-02 | 2.88    | 0.46     | 2897      |
| <i>LIMK2</i>        | LIM domain kinase 2                                                       | 6.2         | 2.93E-06 | 6.85E-03 | 4.64    | 0.75     | 3985      |
| <i>TNNC1</i>        | troponin C1, slow skeletal and cardiac type                               | 6.0         | 4.35E-04 | 8.33E-02 | 1.22    | 0.20     | 7134      |
| <i>ARHGEF3</i>      | Rho guanine nucleotide exchange factor 3                                  | 5.9         | 5.17E-04 | 9.18E-02 | 1.72    | 0.29     | 50650     |
| <i>EPB42</i>        | erythrocyte membrane protein band 4.2                                     | 5.9         | 1.11E-04 | 3.99E-02 | 1.46    | 0.25     | 2038      |
| <i>ADAMTS9</i>      | ADAM metallopeptidase with thrombospondin type 1 motif 9                  | 5.8         | 1.09E-06 | 3.98E-03 | 68.53   | 11.83    | 56999     |
| <i>THBS1</i>        | thrombospondin 1                                                          | 5.4         | 5.19E-06 | 9.38E-03 | 60.97   | 11.20    | 7057      |
| <i>FREM3</i>        | FRAS1 related extracellular matrix 3                                      | 5.4         | 5.21E-04 | 9.21E-02 | 1.04    | 0.19     | 166752    |
| <i>FRZB</i>         | frizzled-related protein                                                  | 5.3         | 4.85E-05 | 2.62E-02 | 113.2   | 21.47    | 2487      |
| <i>PIP5K1B</i>      | phosphatidylinositol-4-phosphate 5-kinase type 1 beta                     | 5.2         | 2.08E-04 | 5.37E-02 | 2.84    | 0.54     | 8395      |
| <i>ISM1</i>         | isthmin 1                                                                 | 5.0         | 5.45E-04 | 9.53E-02 | 0.80    | 0.16     | 140862    |
| <i>SERPINB6</i>     | serpin family B member 6                                                  | 5.0         | 4.34E-04 | 8.33E-02 | 0.55    | 0.11     | 5269      |
| <i>COL8A1</i>       | collagen type VIII alpha 1 chain                                          | 4.8         | 3.72E-05 | 2.27E-02 | 5.21    | 1.09     | 1295      |
| <i>MAMDC2</i>       | MAM domain containing 2                                                   | 4.8         | 2.79E-05 | 2.06E-02 | 20.56   | 4.30     | 256691    |
| <i>CBLN2</i>        | cerebellin 2 precursor                                                    | 4.7         | 5.94E-05 | 2.92E-02 | 31.68   | 6.68     | 147381    |
| <i>CD82</i>         | CD82 molecule                                                             | 4.4         | 4.87E-05 | 2.62E-02 | 5.01    | 1.13     | 3732      |
| <i>PAMR1</i>        | peptidase domain containing associated with muscle regeneration 1         | 4.3         | 1.98E-04 | 5.19E-02 | 2.37    | 0.54     | 25891     |
| <i>DCLK2</i>        | doublecortin like kinase 2                                                | 4.3         | 2.83E-06 | 6.85E-03 | 158.6   | 36.98    | 166614    |
| <i>LINC00672</i>    | long intergenic non-protein coding RNA 672                                | 4.2         | 3.93E-04 | 7.86E-02 | 3.51    | 0.84     | 100505576 |
| <i>GCNT2</i>        | glucosaminyl (N-acetyl) transferase 2, I-branching enzyme (I blood group) | 4.2         | 1.66E-04 | 4.71E-02 | 1.13    | 0.27     | 2651      |
| <i>APCDD1L</i>      | APC down-regulated 1 like                                                 | 4.1         | 4.84E-04 | 8.88E-02 | 1.42    | 0.35     | 164284    |
| <i>ENTPD1</i>       | ectonucleoside triphosphate diphosphohydrolase 1                          | 3.9         | 4.59E-05 | 2.57E-02 | 6.62    | 1.71     | 953       |
| <i>ABCC9</i>        | ATP binding cassette subfamily C member 9                                 | 3.8         | 2.36E-05 | 1.88E-02 | 12.06   | 3.17     | 10060     |
| <i>HOXB4</i>        | homeobox B4                                                               | 3.8         | 3.61E-04 | 7.57E-02 | 1.12    | 0.30     | 3214      |
| <i>CADM1</i>        | cell adhesion molecule 1                                                  | 3.7         | 3.97E-04 | 7.90E-02 | 3.86    | 1.05     | 23705     |
| <i>HOXB3</i>        | homeobox B3                                                               | 3.5         | 6.07E-05 | 2.94E-02 | 16.72   | 4.79     | 3213      |
| <i>SAMD11</i>       | sterile alpha motif domain containing 11                                  | 3.5         | 4.69E-04 | 8.68E-02 | 82.12   | 23.69    | 148398    |
| <i>DNAH14</i>       | dynein axonemal heavy chain 14                                            | 3.3         | 2.80E-04 | 6.36E-02 | 5.58    | 1.67     | 127602    |
| <i>LINC00607</i>    | long intergenic non-protein coding RNA 607                                | 3.3         | 4.54E-04 | 8.58E-02 | 2.71    | 0.83     | 646324    |
| <i>HMGA2</i>        | high mobility group AT-hook 2                                             | 3.2         | 4.57E-04 | 8.58E-02 | 5.04    | 1.59     | 8091      |
| <i>LINC00623</i>    | long intergenic non-protein coding RNA 623                                | 3.2         | 2.62E-04 | 6.08E-02 | 21.25   | 6.72     | 728855    |
| <i>RAI14</i>        | retinoic acid induced 14                                                  | 3.1         | 9.78E-05 | 3.79E-02 | 7.81    | 2.56     | 26064     |
| <i>DOK6</i>         | docking protein 6                                                         | 3.0         | 2.03E-04 | 5.28E-02 | 7.04    | 2.32     | 220164    |
| <i>HOMER1</i>       | homer scaffolding protein 1                                               | 3.0         | 9.81E-05 | 3.79E-02 | 5.58    | 1.85     | 9456      |
| <i>TENM3</i>        | teneurin transmembrane protein 3                                          | 2.7         | 4.97E-04 | 8.99E-02 | 19.90   | 7.41     | 55714     |
| <i>CAMK1D</i>       | calcium/calmodulin dependent protein kinase ID                            | 2.5         | 2.85E-04 | 6.36E-02 | 4.94    | 1.95     | 57118     |
| <i>STIM2</i>        | stromal interaction molecule 2                                            | 2.5         | 3.31E-04 | 7.12E-02 | 5.34    | 2.16     | 57620     |
| <i>PRICKLE2</i>     | prickle planar cell polarity protein 2                                    | 2.3         | 5.55E-04 | 9.56E-02 | 10.20   | 4.35     | 166336    |



Table S5

## Genes Enriched in the Human Ao by RNA-seq (Fold Change; DA vs Ao)

| Gene Symbol      | Gene Name                                                              | Fold Change | P-value  | FDR      | FPKM DA | FPKM Ao | Entrez ID |
|------------------|------------------------------------------------------------------------|-------------|----------|----------|---------|---------|-----------|
| <i>RIMS2</i>     | regulating synaptic membrane exocytosis 2                              | -67.9       | 2.07E-05 | 1.75E-02 | 0.01    | 0.53    | 9699      |
| <i>HPSE2</i>     | heparanase 2 (inactive)                                                | -24.6       | 1.21E-04 | 4.20E-02 | 0.01    | 0.17    | 60495     |
| <i>DCSTAMP</i>   | dendrocyte expressed seven transmembrane protein                       | -20.3       | 3.26E-05 | 2.24E-02 | 0.03    | 0.68    | 81501     |
| <i>PPFIBP1</i>   | PPFIA binding protein 1                                                | -19.8       | 5.48E-04 | 9.53E-02 | 0.01    | 0.22    | 8496      |
| <i>TM6SF1</i>    | transmembrane 6 superfamily member 1                                   | -17.8       | 6.76E-05 | 3.14E-02 | 0.01    | 0.22    | 53346     |
| <i>MGAT4C</i>    | MGAT4 family member C                                                  | -16.3       | 1.30E-04 | 4.26E-02 | 0.02    | 0.34    | 25834     |
| <i>RAPSN</i>     | receptor associated protein of the synapse                             | -15.7       | 1.04E-04 | 3.89E-02 | 0.03    | 0.46    | 5913      |
| <i>TBX20</i>     | T-box 20                                                               | -14.8       | 3.34E-04 | 7.13E-02 | 0.06    | 0.88    | 57057     |
| <i>SPATA6L</i>   | spermatogenesis associated 6 like                                      | -14.6       | 1.27E-04 | 4.26E-02 | 0.01    | 0.15    | 55064     |
| <i>ANXA8L1</i>   | annexin A8-like 1                                                      | -14.2       | 1.58E-05 | 1.51E-02 | 0.16    | 2.30    | 728113    |
| <i>STAC2</i>     | SH3 and cysteine rich domain 2                                         | -13.6       | 7.47E-05 | 3.17E-02 | 0.02    | 0.27    | 342667    |
| <i>GAS2</i>      | growth arrest specific 2                                               | -13.4       | 3.66E-04 | 7.57E-02 | 0.01    | 0.07    | 2620      |
| <i>BRINP2</i>    | BMP/retinoic acid inducible neural specific 2                          | -12.3       | 1.46E-04 | 4.44E-02 | 0.03    | 0.37    | 57795     |
| <i>NEIL1</i>     | nei like DNA glycosylase 1                                             | -11.4       | 5.04E-04 | 9.07E-02 | 0.00    | 0.05    | 79661     |
| <i>RSPO2</i>     | R-spondin 2                                                            | -11.2       | 4.25E-04 | 8.32E-02 | 0.06    | 0.69    | 340419    |
| <i>RBFA</i>      | ribosome binding factor A (putative)                                   | -11.1       | 2.25E-04 | 5.59E-02 | 0.01    | 0.08    | 79863     |
| <i>SLC26A6</i>   | solute carrier family 26 member 6                                      | -9.9        | 5.70E-04 | 9.69E-02 | 0.01    | 0.08    | 65010     |
| <i>FCGR3A</i>    | Fc fragment of IgG receptor IIIa                                       | -9.9        | 4.28E-04 | 8.33E-02 | 0.01    | 0.07    | 2214      |
| <i>MSLN</i>      | mesothelin                                                             | -9.4        | 2.18E-04 | 5.55E-02 | 0.03    | 0.25    | 10232     |
| <i>TFPI2</i>     | tissue factor pathway inhibitor 2                                      | -9.2        | 5.12E-05 | 2.68E-02 | 0.74    | 6.78    | 7980      |
| <i>A4GALT</i>    | alpha 1,4-galactosyltransferase                                        | -8.9        | 1.48E-04 | 4.44E-02 | 0.04    | 0.38    | 53947     |
| <i>GABRB2</i>    | gamma-aminobutyric acid type A receptor beta2 subunit                  | -6.7        | 2.97E-05 | 2.15E-02 | 0.40    | 2.72    | 2561      |
| <i>LDB3</i>      | LIM domain binding 3                                                   | -6.6        | 1.20E-04 | 4.19E-02 | 0.14    | 0.89    | 11155     |
| <i>LRP1B</i>     | LDL receptor related protein 1B                                        | -5.9        | 1.37E-05 | 1.47E-02 | 1.43    | 8.48    | 53353     |
| <i>PKHD1L1</i>   | polycystic kidney and hepatic disease 1 (autosomal recessive)-like 1   | -5.5        | 7.52E-05 | 3.17E-02 | 2.31    | 12.81   | 93035     |
| <i>KALRN</i>     | kalirin, RhoGEF kinase                                                 | -5.3        | 1.24E-04 | 4.21E-02 | 2.36    | 12.63   | 8997      |
| <i>RBM20</i>     | RNA binding motif protein 20                                           | -5.1        | 6.84E-06 | 1.05E-02 | 1.72    | 8.76    | 282996    |
| <i>RIPK4</i>     | receptor interacting serine/threonine kinase 4                         | -5.1        | 3.27E-04 | 7.07E-02 | 0.09    | 0.44    | 54101     |
| <i>MTUS2</i>     | microtubule associated tumor suppressor candidate 2                    | -5.0        | 1.75E-05 | 1.55E-02 | 7.97    | 39.45   | 23281     |
| <i>HAND2</i>     | heart and neural crest derivatives expressed 2                         | -4.8        | 5.10E-05 | 2.68E-02 | 1.17    | 5.61    | 9464      |
| <i>TACC2</i>     | transforming acidic coiled-coil containing protein 2                   | -4.7        | 1.45E-05 | 1.47E-02 | 1.11    | 5.17    | 10579     |
| <i>PLD5</i>      | phospholipase D family member 5                                        | -4.6        | 1.82E-04 | 4.85E-02 | 0.35    | 1.64    | 200150    |
| <i>LINC01099</i> | long intergenic non-protein coding RNA 1099                            | -4.3        | 7.38E-05 | 3.17E-02 | 0.29    | 1.23    | 101928656 |
| <i>CDH13</i>     | cadherin 13                                                            | -4.2        | 1.43E-04 | 4.44E-02 | 3.69    | 15.67   | 1012      |
| <i>MFAP3L</i>    | microfibrillar associated protein 3 like                               | -4.2        | 2.42E-04 | 5.86E-02 | 0.34    | 1.44    | 9848      |
| <i>PDE10A</i>    | phosphodiesterase 10A                                                  | -4.0        | 1.33E-04 | 4.26E-02 | 1.22    | 4.89    | 10846     |
| <i>KDEL1C1</i>   | KDEL motif containing 1                                                | -3.8        | 2.23E-04 | 5.59E-02 | 3.06    | 11.78   | 79070     |
| <i>PHACTR1</i>   | phosphatase and actin regulator 1                                      | -3.7        | 4.03E-04 | 7.97E-02 | 0.70    | 2.61    | 221692    |
| <i>PAPPA2</i>    | pappalysin 2                                                           | -3.7        | 2.49E-04 | 5.90E-02 | 0.69    | 2.56    | 60676     |
| <i>RYR2</i>      | ryanodine receptor 2                                                   | -3.7        | 1.35E-04 | 4.28E-02 | 7.41    | 27.15   | 6262      |
| <i>MAP3K7CL</i>  | MAP3K7 C-terminal like                                                 | -3.7        | 3.54E-05 | 2.24E-02 | 2.64    | 9.66    | 56911     |
| <i>SDK1</i>      | sidekick cell adhesion molecule 1                                      | -3.6        | 4.02E-05 | 2.39E-02 | 2.89    | 10.40   | 221935    |
| <i>FAM19A2</i>   | family with sequence similarity 19 member A2, C-C motif chemokine like | -3.6        | 2.49E-04 | 5.90E-02 | 1.54    | 5.51    | 338811    |
| <i>KCNMA1</i>    | potassium calcium-activated channel subfamily M alpha 1                | -3.5        | 2.74E-04 | 6.27E-02 | 0.49    | 1.69    | 3778      |
| <i>DUSP27</i>    | dual specificity phosphatase 27 (putative)                             | -3.5        | 1.25E-04 | 4.21E-02 | 1.17    | 4.05    | 92235     |
| <i>ASTN1</i>     | astrotactin 1                                                          | -3.4        | 9.73E-05 | 3.79E-02 | 0.83    | 2.77    | 460       |
| <i>KANK4</i>     | KN motif and ankyrin repeat domains 4                                  | -3.3        | 4.31E-04 | 8.33E-02 | 2.30    | 7.62    | 163782    |
| <i>TMTC1</i>     | transmembrane and tetratricopeptide repeat containing 1                | -3.3        | 9.52E-05 | 3.79E-02 | 1.64    | 5.37    | 83857     |
| <i>POSTN</i>     | periostin                                                              | -3.2        | 1.45E-04 | 4.44E-02 | 49.83   | 161.49  | 10631     |
| <i>FIGN</i>      | fidgetin, microtubule severing factor                                  | -3.2        | 3.12E-04 | 6.79E-02 | 2.64    | 8.54    | 55137     |
| <i>RGS17</i>     | regulator of G-protein signaling 17                                    | -3.2        | 4.92E-04 | 8.97E-02 | 0.95    | 3.02    | 26575     |
| <i>PAPPA</i>     | pappalysin 1                                                           | -3.1        | 1.83E-04 | 4.85E-02 | 2.57    | 8.03    | 5069      |
| <i>DSEL</i>      | dermatan sulfate epimerase-like                                        | -3.1        | 2.38E-04 | 5.84E-02 | 33.23   | 103.24  | 92126     |
| <i>NOV</i>       | nephroblastoma overexpressed                                           | -3.0        | 3.40E-04 | 7.23E-02 | 10.92   | 32.35   | 4856      |
| <i>CYFIP2</i>    | cytoplasmic FMR1 interacting protein 2                                 | -2.9        | 1.09E-04 | 3.99E-02 | 1.76    | 5.15    | 26999     |
| <i>WWP2</i>      | WW domain containing E3 ubiquitin protein ligase 2                     | -2.9        | 1.62E-04 | 4.71E-02 | 1.69    | 4.90    | 11060     |
| <i>ADAM22</i>    | ADAM metalloproteinase domain 22                                       | -2.9        | 2.92E-04 | 6.49E-02 | 0.72    | 2.10    | 53616     |
| <i>ZBTB16</i>    | zinc finger and BTB domain containing 16                               | -2.8        | 5.48E-04 | 9.53E-02 | 0.64    | 1.80    | 7704      |
| <i>PAPPA-AS1</i> | PAPPA antisense RNA 1                                                  | -2.7        | 1.48E-04 | 4.44E-02 | 5.10    | 13.89   | 493913    |
| <i>RNF144A</i>   | ring finger protein 144A                                               | -2.7        | 5.55E-04 | 9.56E-02 | 3.67    | 9.98    | 9781      |
| <i>FOXCUT</i>    | FOXC1 upstream transcript (non-protein coding)                         | -2.7        | 5.62E-04 | 9.64E-02 | 0.65    | 1.74    | 101927703 |
| <i>ERBB4</i>     | erb-b2 receptor tyrosine kinase 4                                      | -2.7        | 1.33E-04 | 4.26E-02 | 13.50   | 35.88   | 2066      |
| <i>BVES</i>      | blood vessel epicardial substance                                      | -2.6        | 1.67E-04 | 4.71E-02 | 3.96    | 10.32   | 11149     |
| <i>ADAMTS8</i>   | ADAM metalloproteinase with thrombospondin type 1 motif 8              | -2.6        | 6.86E-05 | 3.14E-02 | 6.12    | 15.95   | 11095     |
| <i>PRELP</i>     | proline and arginine rich end leucine rich repeat protein              | -2.5        | 4.60E-04 | 8.59E-02 | 1.11    | 2.75    | 5549      |
| <i>NPR1</i>      | natriuretic peptide receptor 1                                         | -2.5        | 3.79E-04 | 7.74E-02 | 17.33   | 42.88   | 4881      |
| <i>ENPP1</i>     | ectonucleotide pyrophosphatase/phosphodiesterase 1                     | -2.3        | 2.55E-04 | 5.96E-02 | 28.96   | 67.73   | 5167      |

**Table S6** **Differentially Expressed Genes Most Highly Expressed in the Human DA by RNA-seq (Fold Change; DA vs Ao)**

| Gene ID          | Gene Name                                                 | Fold change | P-value  | FDR      | FPKM DA | FPKM Ao | Entrez Gene |
|------------------|-----------------------------------------------------------|-------------|----------|----------|---------|---------|-------------|
| <i>DCLK2</i>     | doublecortin like kinase 2                                | 4.3         | 2.83E-06 | 6.85E-03 | 158.67  | 36.98   | 166614      |
| <i>FRZB</i>      | frizzled-related protein                                  | 5.3         | 4.85E-05 | 2.62E-02 | 113.24  | 21.47   | 2487        |
| <i>TNC</i>       | tenascin C                                                | 12.1        | 7.76E-08 | 1.60E-03 | 99.27   | 8.22    | 3371        |
| <i>SAMD11</i>    | sterile alpha motif domain containing 11                  | 3.5         | 4.69E-04 | 8.68E-02 | 82.12   | 23.69   | 148398      |
| <i>ADAMTS9</i>   | ADAM metalloproteinase with thrombospondin type 1 motif 9 | 5.8         | 1.09E-06 | 3.98E-03 | 68.53   | 11.83   | 56999       |
| <i>THBS1</i>     | thrombospondin 1                                          | 5.4         | 5.19E-06 | 9.38E-03 | 60.97   | 11.20   | 7057        |
| <i>CBLN2</i>     | cerebellin 2 precursor                                    | 4.7         | 5.94E-05 | 2.92E-02 | 31.68   | 6.68    | 147381      |
| <i>INMT</i>      | indoletylamine N-methyltransferase                        | 6.8         | 7.89E-05 | 3.23E-02 | 23.55   | 3.47    | 11185       |
| <i>PTGER4</i>    | prostaglandin E receptor 4                                | 20.5        | 9.38E-08 | 1.60E-03 | 21.27   | 1.04    | 5734        |
| <i>LINC00623</i> | long intergenic non-protein coding RNA 623                | 3.2         | 2.62E-04 | 6.08E-02 | 21.25   | 6.72    | 728855      |
| <i>MAMDC2</i>    | MAM domain containing 2                                   | 4.8         | 2.79E-05 | 2.06E-02 | 20.56   | 4.30    | 256691      |
| <i>C1QTNF3</i>   | C1q and tumor necrosis factor related protein 3           | 9.5         | 1.21E-05 | 1.42E-02 | 20.52   | 2.16    | 114899      |
| <i>TENM3</i>     | teneurin transmembrane protein 3                          | 2.7         | 4.97E-04 | 8.99E-02 | 19.90   | 7.41    | 55714       |
| <i>MAB21L2</i>   | mab-21 like 2                                             | 25.3        | 2.08E-06 | 5.51E-03 | 16.77   | 0.66    | 10586       |
| <i>HOXB3</i>     | homeobox B3                                               | 3.5         | 6.07E-05 | 2.94E-02 | 16.72   | 4.79    | 3213        |
| <i>DLX2</i>      | distal-less homeobox 2                                    | 7.4         | 2.61E-05 | 2.00E-02 | 14.15   | 1.90    | 1746        |
| <i>ABCC9</i>     | ATP binding cassette subfamily C member 9                 | 3.8         | 2.36E-05 | 1.88E-02 | 12.06   | 3.17    | 10060       |
| <i>NEXMIF</i>    | Neurite Extension And Migration Factor                    | 7.8         | 7.96E-07 | 3.52E-03 | 11.00   | 1.40    | 340533      |
| <i>KRT17</i>     | keratin 17                                                | 24.6        | 5.31E-05 | 2.74E-02 | 10.97   | 0.45    | 3872        |
| <i>PRICKLE2</i>  | prickle planar cell polarity protein 2                    | 2.3         | 5.55E-04 | 9.56E-02 | 10.20   | 4.35    | 166336      |

**Table S7 GO, KEGG, and UP Keywords Common in Human RNA-seq and Rodent Microarrays**

|                                                                                                                          | RNA-seq<br>Count | RNA-seq<br>PValue | Microarray<br>Count <sup>1</sup> | Microarray<br>PValue |
|--------------------------------------------------------------------------------------------------------------------------|------------------|-------------------|----------------------------------|----------------------|
| <b>GO Biological Process – Overlap: 30/62 Common 48.4%</b>                                                               |                  |                   |                                  |                      |
| GO:0001501–skeletal system development                                                                                   | 6                | 7.53E-03          | 10                               | 1.87E-05             |
| GO:0001525–angiogenesis                                                                                                  | 6                | 4.88E-02          | 8                                | 1.79E-02             |
| GO:0001822–kidney development                                                                                            | 4                | 4.11E-02          | 14                               | 2.86E-07             |
| GO:0006366–transcription from RNA polymerase II promoter                                                                 | 9                | 8.68E-02          | 15                               | 2.10E-03             |
| GO:0007155–cell adhesion                                                                                                 | 16               | 1.45E-05          | 16                               | 6.55E-06             |
| GO:0007166–cell surface receptor signaling pathway                                                                       | 6                | 9.73E-02          | 10                               | 1.98E-03             |
| GO:0007188–adenylate cyclase-modulating G-protein coupled receptor signaling pathway                                     | 3                | 4.25E-02          | 3                                | 7.81E-02             |
| GO:0007399–nervous system development                                                                                    | 7                | 4.30E-02          | 10                               | 2.52E-03             |
| GO:0007420–brain development                                                                                             | 5                | 8.88E-02          | 13                               | 1.61E-03             |
| GO:0007507–heart development                                                                                             | 6                | 2.36E-02          | 19                               | 2.22E-07             |
| GO:0008284–positive regulation of cell proliferation                                                                     | 9                | 5.61E-02          | 23                               | 4.38E-06             |
| GO:0009612–response to mechanical stimulus                                                                               | 5                | 1.86E-03          | 10                               | 2.02E-05             |
| GO:0009952–anterior/posterior pattern specification                                                                      | 5                | 5.59E-03          | 7                                | 6.59E-03             |
| GO:0010628–positive regulation of gene expression                                                                        | 6                | 8.42E-02          | 19                               | 8.36E-06             |
| GO:0010811–positive regulation of cell-substrate adhesion                                                                | 3                | 4.47E-02          | 4                                | 2.73E-02             |
| GO:0016337–single organismal cell-cell adhesion                                                                          | 9                | 3.20E-06          | 6                                | 1.84E-02             |
| GO:0016525–negative regulation of angiogenesis                                                                           | 4                | 1.77E-02          | 4                                | 7.07E-02             |
| GO:0021766–hippocampus development                                                                                       | 3                | 8.83E-02          | 5                                | 4.93E-02             |
| GO:0030198–extracellular matrix organization                                                                             | 14               | 2.09E-08          | 10                               | 1.15E-05             |
| GO:0030308–negative regulation of cell growth                                                                            | 6                | 4.48E-03          | 9                                | 4.04E-04             |
| GO:0042475–odontogenesis of dentin-containing tooth                                                                      | 4                | 1.28E-02          | 5                                | 1.46E-02             |
| GO:0043065–positive regulation of apoptotic process                                                                      | 11               | 3.50E-04          | 11                               | 2.57E-02             |
| GO:0045600–positive regulation of fat cell differentiation                                                               | 3                | 6.52E-02          | 4                                | 3.40E-02             |
| GO:0048704–embryonic skeletal system morphogenesis                                                                       | 3                | 4.68E-02          | 5                                | 8.76E-03             |
| GO:0050715–positive regulation of cytokine secretion                                                                     | 3                | 2.05E-02          | 3                                | 7.81E-02             |
| GO:0051216–cartilage development                                                                                         | 5                | 1.86E-03          | 6                                | 3.04E-03             |
| GO:0060441–epithelial tube branching involved in lung morphogenesis                                                      | 4                | 2.88E-04          | 4                                | 4.85E-03             |
| GO:0071356–cellular response to tumor necrosis factor                                                                    | 4                | 7.45E-02          | 7                                | 1.30E-02             |
| GO:0072210–metanephric nephron development                                                                               | 2                | 1.77E-02          | 2                                | 5.67E-02             |
| GO:0097070–ductus arteriosus closure                                                                                     | 2                | 4.36E-02          | 2                                | 8.38E-02             |
| <b>GO Cellular Component – Overlap: 12/19 Common, 63.2%</b>                                                              | <b>Count</b>     | <b>PValue</b>     | <b>Count</b>                     | <b>PValue</b>        |
| GO:0005576–extracellular region                                                                                          | 22               | 5.39E-02          | 18                               | 2.87E-02             |
| GO:0005578–proteinaceous extracellular matrix                                                                            | 12               | 3.19E-05          | 31                               | 3.83E-19             |
| GO:0005615–extracellular space                                                                                           | 21               | 1.85E-02          | 46                               | 3.97E-08             |
| GO:0005886–plasma membrane                                                                                               | 52               | 7.34E-03          | 78                               | 1.91E-03             |
| GO:0005887–integral component of plasma membrane                                                                         | 23               | 8.29E-03          | 28                               | 4.81E-04             |
| GO:0009897–external side of plasma membrane                                                                              | 7                | 1.27E-02          | 8                                | 8.98E-02             |
| GO:0016020–membrane                                                                                                      | 31               | 1.29E-02          | 48                               | 3.18E-03             |
| GO:0030424–axon                                                                                                          | 6                | 5.05E-02          | 15                               | 7.40E-04             |
| GO:0030425–dendrite                                                                                                      | 7                | 8.26E-02          | 18                               | 5.96E-04             |
| GO:0031012–extracellular matrix                                                                                          | 11               | 3.57E-04          | 23                               | 1.62E-11             |
| GO:0043005–neuron projection                                                                                             | 6                | 6.34E-02          | 17                               | 1.82E-04             |
| GO:0045211–postsynaptic membrane                                                                                         | 7                | 1.22E-02          | 8                                | 2.35E-02             |
| <b>GO Molecular Function – Overlap: 9/19 Common, 47.4%</b>                                                               | <b>Count</b>     | <b>PValue</b>     | <b>Count</b>                     | <b>PValue</b>        |
| GO:0001077–transcriptional activator activity, RNA polymerase II core promoter proximal region sequence-specific binding | 6                | 6.38E-02          | 11                               | 4.61E-03             |
| GO:0005178–integrin binding                                                                                              | 7                | 3.87E-04          | 9                                | 1.17E-04             |
| GO:0005201–extracellular matrix structural constituent                                                                   | 4                | 2.29E-02          | 6                                | 5.65E-04             |
| GO:0005509–calcium ion binding                                                                                           | 17               | 8.07E-04          | 23                               | 6.72E-04             |
| GO:0008201–heparin binding                                                                                               | 6                | 1.53E-02          | 13                               | 1.77E-06             |
| GO:0042803–protein homodimerization activity                                                                             | 12               | 6.82E-02          | 29                               | 2.36E-05             |
| GO:0043565–sequence-specific DNA binding                                                                                 | 9                | 9.93E-02          | 15                               | 4.36E-02             |
| GO:0044325–ion channel binding                                                                                           | 4                | 8.33E-02          | 9                                | 6.00E-04             |
| GO:0050839–cell adhesion molecule binding                                                                                | 4                | 1.87E-02          | 4                                | 8.78E-02             |
| <b>Kegg Pathway – Overlap: 5/9 Common, 55.6%</b>                                                                         | <b>Count</b>     | <b>PValue</b>     | <b>Count</b>                     | <b>PValue</b>        |
| hsa04020–Calcium signaling pathway                                                                                       | 8                | 1.13E-03          | 11                               | 4.17E-04             |
| hsa04024–cAMP signaling pathway                                                                                          | 6                | 3.38E-02          | 10                               | 2.45E-03             |
| hsa04724–Glutamatergic synapse                                                                                           | 4                | 8.53E-02          | 5                                | 9.25E-02             |
| hsa04911–Insulin secretion                                                                                               | 4                | 4.21E-02          | 7                                | 1.72E-03             |
| hsa04924–Renin secretion                                                                                                 | 4                | 2.03E-02          | 5                                | 1.75E-02             |
| <b>UP Keywords – Overlap: 22/37 Common, 59.5%</b>                                                                        | <b>Count</b>     | <b>PValue</b>     | <b>Count</b>                     | <b>PValue</b>        |
| Alternative splicing                                                                                                     | 108              | 2.76E-03          | 41                               | 4.73E-11             |
| Calcium                                                                                                                  | 21               | 4.63E-05          | 18                               | 2.18E-03             |
| cAMP                                                                                                                     | 3                | 3.63E-02          | 3                                | 4.54E-02             |
| Cell adhesion                                                                                                            | 23               | 9.66E-11          | 12                               | 1.52E-03             |
| Cell junction                                                                                                            | 16               | 5.61E-04          | 11                               | 8.95E-02             |
| Cell membrane                                                                                                            | 43               | 1.35E-03          | 53                               | 1.74E-02             |
| Cleavage on pair of basic residues                                                                                       | 7                | 3.74E-02          | 12                               | 2.45E-05             |
| Collagen                                                                                                                 | 5                | 9.26E-03          | 4                                | 5.19E-02             |

|                       |    |          |     |          |
|-----------------------|----|----------|-----|----------|
| Developmental protein | 19 | 1.02E-03 | 22  | 2.44E-06 |
| Disulfide bond        | 56 | 5.71E-07 | 75  | 1.21E-14 |
| EGF-like domain       | 10 | 1.82E-04 | 9   | 1.81E-03 |
| Extracellular matrix  | 14 | 2.77E-07 | 11  | 1.06E-05 |
| Glycoprotein          | 83 | 1.03E-13 | 72  | 6.87E-14 |
| Heparin-binding       | 4  | 3.76E-02 | 7   | 4.75E-05 |
| Hydroxylation         | 4  | 4.54E-02 | 6   | 5.90E-04 |
| Immunoglobulin domain | 12 | 6.32E-03 | 10  | 6.76E-03 |
| Membrane              | 81 | 4.02E-03 | 112 | 2.91E-02 |
| Metalloprotease       | 5  | 3.88E-02 | 5   | 4.29E-02 |
| Secreted              | 36 | 1.31E-05 | 40  | 3.87E-09 |
| Signal                | 73 | 7.28E-11 | 88  | 1.99E-10 |
| Signal-anchor         | 9  | 3.78E-02 | 7   | 7.95E-02 |
| Synapse               | 14 | 1.02E-05 | 8   | 9.50E-02 |

---

<sup>†</sup>Number of genes identified within each term

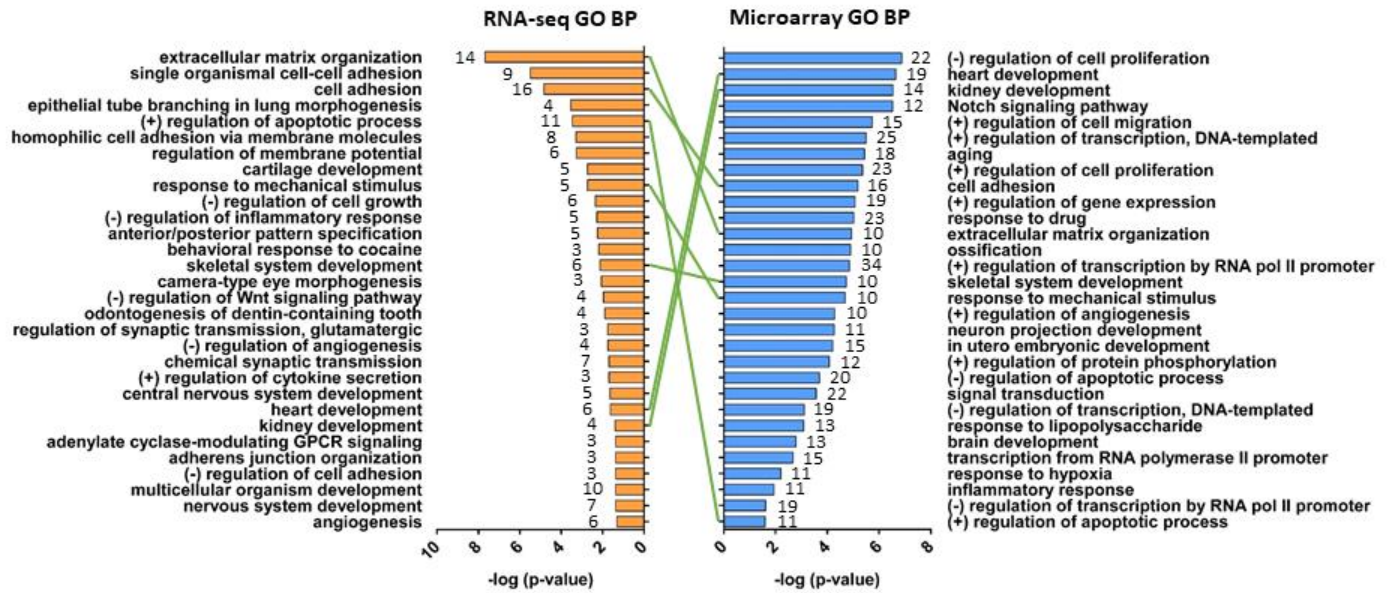

**Figure S1. 'Tornadogram' showing top 30 GO Biological Process (BP) terms common between Microarray and RNAseq analyses.** Genes differentially expressed in DA vs. Ao were categorized by functional annotation (DAVID), plotted by p-value, and compared across platforms. Number of genes represented in each category shown at the end of bars.

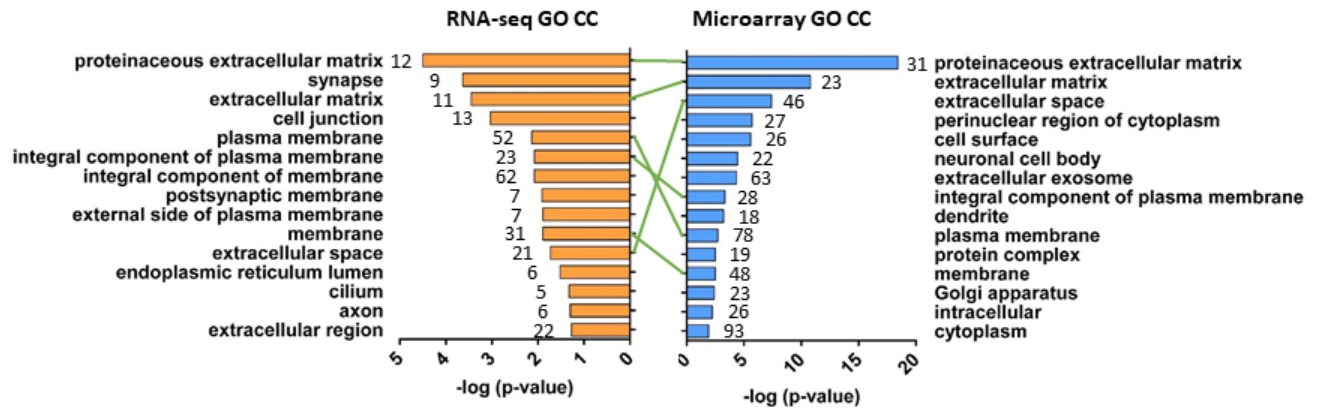

**Figure S2. ‘Tornadogram’ showing top 30 GO Cellular Component (CC) terms common between Microarray and RNAseq analyses.** Genes differentially expressed in DA vs. Ao were categorized by functional annotation (DAVID), plotted by p-value, and compared across platforms. Number of genes represented in each category shown at the end of bars.
